# Supplementary material for: In Silico Identification of Novel Derivatives of Rifampicin Targeting Ribonuclease VapC2 of M. tuberculosis H37Rv: Rifampicin Derivatives Target VapC2 of Mtb H37Rv
Source: MDPI journal article supplement (doi:10.3390/molecules28041652), 2023-02-08
Supplement: s1 [file s1]

## Supplementary Materials

# In Silico Identification of Novel Derivatives of Rifampicin Targeting Ribonuclease VapC2 of *M. tuberculosis* H37Rv: Rifampicin derivatives target VapC2 of *Mtb* H37Rv

Satyamvada Maurya <sup>1</sup>, Amita Jain <sup>2</sup>, Md Tabish Rehman <sup>3</sup>, Ali Hakamy <sup>4</sup>, Farkad Bantun <sup>5</sup>, Mohamed F. AlAjmi <sup>3</sup>, Vineeta Singh <sup>1</sup>, Aafreen Zehra <sup>6</sup>, Feroz Khan <sup>6</sup>, Shafiul Haque <sup>7,8,9</sup> and Bhartendu Nath Mishra <sup>1,\*</sup>

\* Correspondence: profbnmishra@gmail.com; Tel.: +91-522-2361692; Fax: +91-522-2361631

**Table S1.** Binding energy of known *Mtb* drugs with VapC2 protein through blind docking.

| S.No. | Drugs               | Docking energy (kcal mol <sup>-1</sup> ) |
|-------|---------------------|------------------------------------------|
| 1     | Amikacin            | -8.4                                     |
| 2     | Amoxicillin         | -7.4                                     |
| 3     | Bedaquiline         | -8.7                                     |
| 4     | Cilastatin          | -5.9                                     |
| 5     | Clavulanate         | -6                                       |
| 6     | Clofazimine         | -7.2                                     |
| 7     | Cycloserine         | -4.6                                     |
| 8     | Ethambutol          | -4.6                                     |
| 9     | Ethionamide         | -5.3                                     |
| 10    | Gatifloxacin        | -7.1                                     |
| 11    | Imipenem            | -6.3                                     |
| 12    | Isoniazid           | -4.9                                     |
| 13    | Kanamycin           | -7.6                                     |
| 14    | Levofloxacin        | -6.4                                     |
| 15    | Linezolid           | -8.1                                     |
| 16    | Meropenem           | -6.7                                     |
| 17    | Moxifloxacin        | -6.2                                     |
| 18    | Ofloxacin           | -6.6                                     |
| 19    | Paminosalicylicacid | -5.2                                     |
| 20    | Pyrazinamide        | -4.4                                     |
| 21    | Rifampicin          | -8.8                                     |
| 22    | Streptomycin        | -7.3                                     |

**Table S2.** Training dataset with experimental & predicted values.

| Compound No. | Experimental Activity<br>Log10(IC <sub>50</sub> nM) | Experimental Activity<br>Log10(IC <sub>50</sub> ) | Predicted Activity<br>Log10(IC <sub>50</sub> ) | Error |
|--------------|-----------------------------------------------------|---------------------------------------------------|------------------------------------------------|-------|
| C1           | 11                                                  | 1.04                                              | 1.39                                           | -0.35 |
| C2           | 5375.16                                             | 3.73                                              | 3.70                                           | 0.04  |
| C3           | 5914.22                                             | 3.77                                              | 3.82                                           | -0.05 |
| C4           | 91                                                  | 1.96                                              | 1.79                                           | 0.17  |
| C5           | 71280                                               | 4.85                                              | 4.86                                           | -0.01 |
| C6           | 62340                                               | 4.79                                              | 3.86                                           | 0.94  |
| C7           | 15510                                               | 4.19                                              | 3.72                                           | 0.47  |
| C8           | 6250                                                | 3.80                                              | 3.65                                           | 0.14  |
| C9           | 50259.36                                            | 4.70                                              | 4.12                                           | 0.58  |
| C10          | 52020                                               | 4.72                                              | 4.86                                           | -0.14 |
| C11          | 6918.31                                             | 3.84                                              | 3.97                                           | -0.13 |
| C12          | 870.96                                              | 2.94                                              | 3.74                                           | -0.80 |
| C13          | 83176.38                                            | 4.92                                              | 4.00                                           | 0.92  |
| C14          | 3090.3                                              | 3.49                                              | 3.81                                           | -0.32 |
| C15          | 3019.975                                            | 3.48                                              | 4.16                                           | -0.68 |
| C16          | 10000                                               | 4.00                                              | 3.77                                           | 0.23  |
| C17          | 6500                                                | 3.81                                              | 4.74                                           | -0.93 |
| C18          | 1970                                                | 3.29                                              | 3.70                                           | -0.40 |
| C19          | 570                                                 | 2.76                                              | 2.62                                           | 0.14  |
| C20          | 2187.76                                             | 3.34                                              | 3.10                                           | 0.24  |
| C21          | 26361.34                                            | 4.42                                              | 4.26                                           | 0.16  |
| C22          | 1174.9                                              | 3.07                                              | 3.91                                           | -0.84 |
| C23          | 44350                                               | 4.65                                              | 4.83                                           | -0.18 |
| C24          | 61930                                               | 4.79                                              | 4.75                                           | 0.04  |
| C25          | 1778.28                                             | 3.25                                              | 3.92                                           | -0.67 |
| C26          | 4466.84                                             | 3.65                                              | 3.82                                           | -0.17 |
| C27          | 72330                                               | 4.86                                              | 5.14                                           | -0.28 |
| C28          | 3019.95                                             | 3.48                                              | 3.90                                           | -0.42 |
| C29          | 1200                                                | 3.08                                              | 2.96                                           | 0.12  |
| C30          | 22473.605                                           | 4.35                                              | 4.71                                           | -0.36 |
| C31          | 10271.465                                           | 4.01                                              | 5.15                                           | -1.14 |
| C32          | 69211.55                                            | 4.84                                              | 4.38                                           | 0.46  |
| C33          | 30                                                  | 1.48                                              | 2.51                                           | -1.04 |
| C34          | 3260                                                | 3.51                                              | 3.81                                           | -0.30 |
| C35          | 97480                                               | 4.99                                              | 4.40                                           | 0.59  |
| C36          | 6423.27                                             | 3.81                                              | 3.89                                           | -0.09 |
| C37          | 6830                                                | 3.83                                              | 4.41                                           | -0.58 |
| C38          | 5011.87                                             | 3.70                                              | 3.21                                           | 0.49  |
| C39          | 4500                                                | 3.65                                              | 3.93                                           | -0.28 |
| C40          | 12000                                               | 4.08                                              | 4.23                                           | -0.15 |
| C41          | 33877.21                                            | 4.53                                              | 4.04                                           | 0.49  |
| C42          | 7109.73                                             | 3.85                                              | 4.40                                           | -0.55 |
| C43          | 51353.07                                            | 4.71                                              | 4.19                                           | 0.52  |
| C44          | 46846.755                                           | 4.67                                              | 4.31                                           | 0.36  |
| C45          | 22288.605                                           | 4.35                                              | 4.35                                           | 0.00  |
| C46          | 28056.915                                           | 4.45                                              | 4.09                                           | 0.35  |

|     |             |      |      |       |
|-----|-------------|------|------|-------|
| C47 | 96          | 1.98 | 2.06 | -0.08 |
| C48 | 95484.63    | 4.98 | 3.81 | 1.17  |
| C49 | 26915.35    | 4.43 | 3.92 | 0.51  |
| C50 | 10495.645   | 4.02 | 3.99 | 0.03  |
| C51 | 7212.18     | 3.86 | 3.93 | -0.07 |
| C52 | 9771.185    | 3.99 | 4.08 | -0.09 |
| C53 | 150         | 2.18 | 1.87 | 0.31  |
| C54 | 12882.5     | 4.11 | 4.00 | 0.11  |
| C55 | 7000        | 3.85 | 3.91 | -0.06 |
| C56 | 6810        | 3.83 | 3.81 | 0.02  |
| C57 | 68500       | 4.84 | 4.88 | -0.04 |
| C58 | 43470.79    | 4.64 | 3.76 | 0.88  |
| C59 | 21983.81    | 4.34 | 4.87 | -0.53 |
| C60 | 147.1428571 | 2.17 | 2.55 | -0.38 |
| C61 | 7436.55     | 3.87 | 3.70 | 0.17  |
| C62 | 43000       | 4.63 | 4.97 | -0.33 |
| C63 | 250         | 2.40 | 2.40 | 0.00  |
| C64 | 1330        | 3.12 | 2.88 | 0.24  |
| C65 | 320         | 2.51 | 2.47 | 0.04  |
| C66 | 12644.625   | 4.10 | 4.23 | -0.13 |
| C67 | 2640.135    | 3.42 | 4.55 | -1.13 |
| C68 | 51          | 1.71 | 2.63 | -0.92 |
| C69 | 83130       | 4.92 | 4.97 | -0.05 |
| C70 | 21          | 1.32 | 1.55 | -0.23 |
| C71 | 16635       | 4.22 | 3.92 | 0.30  |
| C72 | 1170        | 3.07 | 3.40 | -0.33 |
| C73 | 6880        | 3.84 | 3.71 | 0.13  |
| C74 | 92960       | 4.97 | 4.18 | 0.78  |
| C75 | 86          | 1.93 | 2.71 | -0.77 |
| C76 | 5           | 0.70 | 1.71 | -1.01 |
| C77 | 56234.13    | 4.75 | 3.93 | 0.82  |
| C78 | 8104.155    | 3.91 | 4.41 | -0.50 |
| C79 | 17          | 1.23 | 1.55 | -0.32 |
| C80 | 73410       | 4.87 | 4.30 | 0.56  |
| C81 | 19400       | 4.29 | 3.59 | 0.70  |
| C82 | 13182.57    | 4.12 | 3.86 | 0.26  |
| C83 | 316.23      | 2.50 | 2.77 | -0.27 |
| C84 | 58940       | 4.77 | 4.38 | 0.39  |
| C85 | 22908.68    | 4.36 | 4.11 | 0.25  |
| C86 | 4570        | 3.66 | 4.21 | -0.55 |
| C87 | 50          | 1.70 | 1.72 | -0.02 |
| C88 | 20000       | 4.30 | 3.00 | 1.30  |
| C89 | 85510       | 4.93 | 3.99 | 0.94  |
| C90 | 250         | 2.40 | 2.40 | 0.00  |
| C91 | 26236.34    | 4.42 | 3.25 | 1.17  |
| C92 | 12500       | 4.10 | 3.66 | 0.44  |
| C93 | 1513.56     | 3.18 | 3.09 | 0.09  |
| C94 | 8303.82     | 3.92 | 4.40 | -0.48 |
| C95 | 9500        | 3.98 | 3.79 | 0.19  |
| C96 | 13000       | 4.11 | 3.93 | 0.18  |
| C97 | 12091.32    | 4.08 | 4.38 | -0.30 |

**Table S3.** Binding energy of 155841\_3h87 (VapC2) complex with all poses.

| S.No. | Poses | Docking energy (kcal mol <sup>-1</sup> ) |
|-------|-------|------------------------------------------|
| 1     | Pose1 | -8.1                                     |
| 2     | Pose2 | -7.1                                     |
| 3     | Pose3 | -6.9                                     |
| 4     | Pose4 | -6.9                                     |
| 5     | Pose5 | -6.7                                     |
| 6     | Pose6 | -6.4                                     |
| 7     | Pose7 | -6.3                                     |
| 8     | Pose8 | -6.0                                     |
| 9     | Pose9 | -6.0                                     |

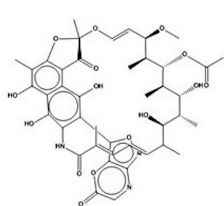

2074

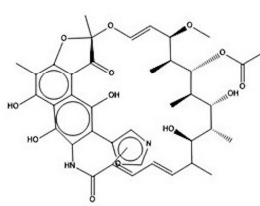

21466

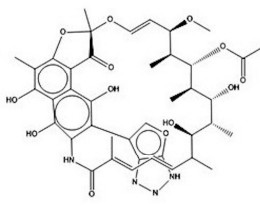

25606

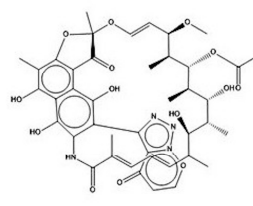

73574

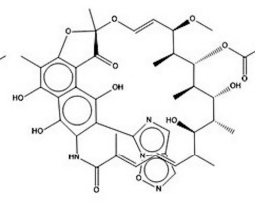

92770

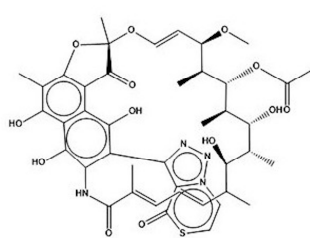

116017

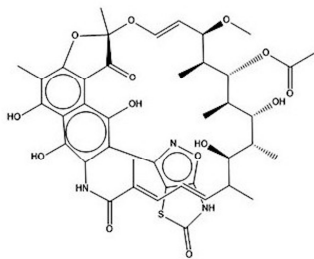

131214

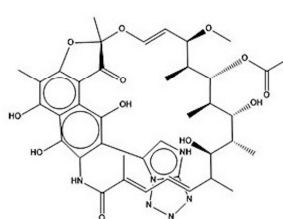

138805

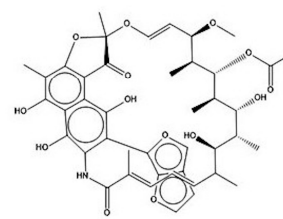

143641

**Figure S1.** Chemical structures of RIF derivatives 2-10.

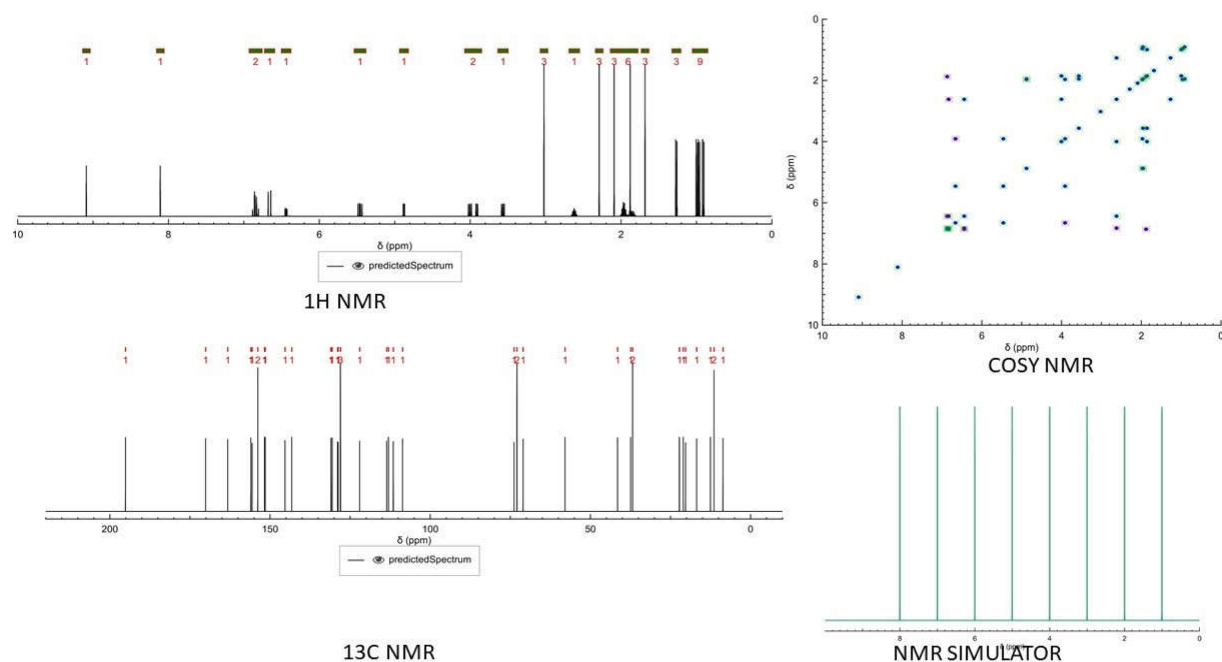

**Figure S2.** NMR characterization of derivative 1 (RIF 155841).

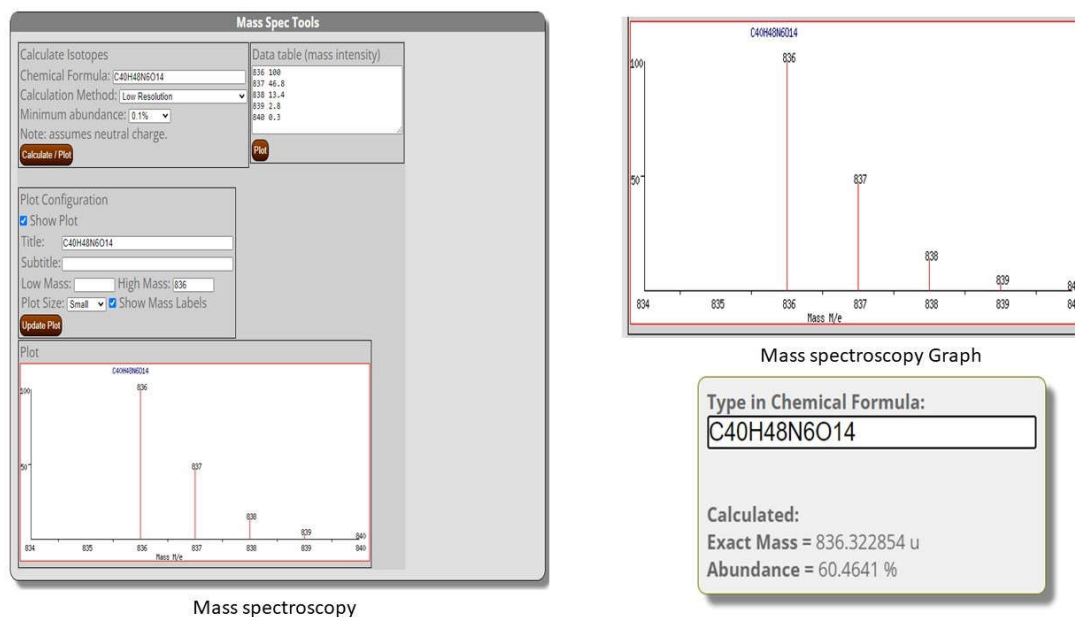

**Figure S3.** Mass spectroscopic characterization data of derivative 1 (RIF 155841).
